# Supplementary material
Source: PubMed Central journal article supplement (PMC4834915)
Supplement: supp_mev082_Supplementary_information_AnnHyg_15_0049.R2.pdf [file supp_mev082_Supplementary_information_AnnHyg_15_0049.R2.pdf]

## Supplementary information

### Occupational exposure to multi-walled carbon nanotubes during commercial production synthesis and handling.

5

E. Kuijpers<sup>1\*</sup>, C. Bekker<sup>1,2</sup>, W. Fransman<sup>1</sup>, D. Brouwer<sup>1</sup>, P. Tromp<sup>1</sup>, J. Vlaanderen<sup>2</sup>, L. Godderis<sup>3,4</sup>, P. Hoet<sup>3</sup>, Q. Lan<sup>5</sup>, D. Silverman<sup>5</sup>, R. Vermeulen<sup>2</sup>, A. Pronk<sup>1</sup>.

<sup>1</sup> TNO - P.O. Box 360, Zeist, The Netherlands.

<sup>2</sup> IRAS - Institute for Risk Assessment Sciences, Molecular Epidemiology and Risk Assessment  
10 Utrecht, Nederland.

<sup>3</sup> Katholieke Universiteit Leuven – Centre for Environment and Health, Leuven, Belgium

<sup>4</sup> IDEWE, External Service for Prevention and Protection at Work, Heverlee, Belgium

<sup>5</sup> Occupational and Environmental Epidemiology Branch, Division of Cancer Epidemiology and  
15 Genetics, National Cancer Institute, National Institutes of Health, Department of Health and Human  
Services, Bethesda, MD, United States

\* Corresponding author phone: +31 (0) 888660783; e-mail: eelco.kuijpers@tno.nl

Table S1: Detailed results personal measurements production area during handling period.

| Date       | Personal ID | OC<br>µg/m <sup>3</sup> | EC1<br>µg/m <sup>3</sup> | EC2<br>µg/m <sup>3</sup> | EC3<br>µg/m <sup>3</sup> | Inhalable<br>CNT+BC<br>(EC2+EC3)<br>µg/m <sup>3</sup> | Background<br>µg/m <sup>3</sup> | Inhalable<br>CNT<br>µg/m <sup>3</sup> |
|------------|-------------|-------------------------|--------------------------|--------------------------|--------------------------|-------------------------------------------------------|---------------------------------|---------------------------------------|
| 28-05-2013 | 1           | 353.8                   | 87.7                     | 126.6                    | 48.8                     | 175.37                                                | 1.90                            | 173.47                                |
|            | 2           | 65.3                    | 19.2                     | 16.0                     | 2.3                      | 18.23                                                 | 1.90                            | 16.33                                 |
|            | 3           | 1805.7                  | 484.1                    | 432.5                    | 20.7                     | 453.21                                                | 1.90                            | 451.31                                |
|            | 4           | 45.0                    | 11.9                     | 13.2                     | 6.0                      | 19.24                                                 | 1.90                            | 17.34                                 |
|            | 5           | 50.5                    | 8.2                      | 5.3                      | 1.3                      | 6.60                                                  | 1.90                            | 4.70                                  |
|            | 6           | 42.9                    | 10.1                     | 25.2                     | 2.7                      | 27.95                                                 | 1.90                            | 26.05                                 |
|            | 7           | 118.1                   | 66.0                     | 35.3                     | 3.0                      | 38.33                                                 | 1.90                            | 36.43                                 |
| 29-05-2013 | 1           | 113.1                   | 34.3                     | 410.9                    | 776.3                    | 1187.22                                               | 0.70                            | 1186.52                               |
|            | 2           | 77.3                    | 25.4                     | 30.2                     | 3.6                      | 33.80                                                 | 0.70                            | 33.10                                 |
|            | 5           | 50.5                    | 13.1                     | 16.7                     | 2.6                      | 19.29                                                 | 0.70                            | 18.59                                 |
|            | 4           | 22.2                    | 2.6                      | 1.8                      | 0.3                      | 2.13                                                  | 0.70                            | 1.43                                  |
|            | 6           | 48.7                    | 13.4                     | 20.8                     | 2.5                      | 23.28                                                 | 0.70                            | 22.58                                 |
|            | 7           | 82.9                    | 28.8                     | 19.0                     | 2.5                      | 21.44                                                 | 0.70                            | 20.74                                 |
|            | 30-05-2013  | 1                       | 78.9                     | 27.4                     | 277.5                    | 114.3                                                 | 391.87                          | 0.80                                  |
| 2          |             | 76.7                    | 36.5                     | 187.9                    | 68.7                     | 256.61                                                | 0.80                            | 255.81                                |
| 5          |             | 112.7                   | 52.1                     | 239.6                    | 64.7                     | 304.32                                                | 0.80                            | 303.52                                |
| 4          |             | 92.8                    | 27.7                     | 12.5                     | 1.1                      | 13.62                                                 | 0.80                            | 12.82                                 |
| 6          |             | 56.3                    | 16.6                     | 9.8                      | 1.2                      | 11.03                                                 | 0.80                            | 10.23                                 |
| 7          |             | 57.7                    | 20.7                     | 37.1                     | 11.2                     | 48.25                                                 | 0.80                            | 47.45                                 |

20 Table S2: Detailed results personal measurements production area during synthesis period.

| Date       | Personal ID | OC $\mu\text{g}/\text{m}^3$ | EC1 $\mu\text{g}/\text{m}^3$ | EC2 $\mu\text{g}/\text{m}^3$ | EC3 $\mu\text{g}/\text{m}^3$ | Inhalable CNT+BC* $\mu\text{g}/\text{m}^3$ | Background $\mu\text{g}/\text{m}^3$ | Inhalable CNT $\mu\text{g}/\text{m}^3$ |
|------------|-------------|-----------------------------|------------------------------|------------------------------|------------------------------|--------------------------------------------|-------------------------------------|----------------------------------------|
| 07-10-2013 | 3           | 72.7                        | 12.9                         | 79.8                         | 27.0                         | 106.9                                      | 5                                   | 101.9                                  |
|            |             |                             |                              |                              |                              |                                            |                                     |                                        |
| 26-11-2013 | 6           | 66.4                        | 14.5                         | 35.0                         | 4.6                          | 39.62                                      | 1                                   | 38.62                                  |
|            | 3           | 24.9                        | 4.1                          | 3.7                          | 1.4                          | 5.11                                       | 1                                   | 4.11                                   |
|            | 8           | 97.9                        | 19.5                         | 35.5                         | 12.4                         | 47.90                                      | 1                                   | 46.90                                  |
|            |             |                             |                              |                              |                              |                                            |                                     |                                        |
| 27-11-2013 | 4           | 57.8                        | 13.2                         | 12.6                         | 2.3                          | 14.84                                      | 2.9                                 | 11.94                                  |
|            | 1           | 32.3                        | 5.9                          | 13.9                         | 5.3                          | 19.21                                      | 2.9                                 | 16.31                                  |
|            | 5           | 33.3                        | 8.9                          | 13.2                         | 4.8                          | 17.98                                      | 2.9                                 | 15.08                                  |
|            | 7           | 95.7                        | 26.4                         | 25.2                         | 37.2                         | 62.37                                      | 2.9                                 | 59.47                                  |
|            | 9           | 58.3                        | 12.1                         | 12.5                         | 5.5                          | 17.95                                      | 2.9                                 | 15.05                                  |
|            | 10          | 50.8                        | 9.9                          | 16.5                         | 8.0                          | 24.47                                      | 2.9                                 | 21.57                                  |
|            | 2           | 202.1                       | 59.4                         | 189.2                        | 71.3                         | 260.47                                     | 2.9                                 | 257.57                                 |
|            |             |                             |                              |                              |                              |                                            |                                     |                                        |
| 28-11-2013 | 4           | 71.1                        | 23.1                         | 79.8                         | 31.1                         | 110.81                                     | 5.7                                 | 105.11                                 |
|            | 1           | 122.9                       | 39.8                         | 234.2                        | 62.9                         | 297.04                                     | 5.7                                 | 291.34                                 |
|            | 5           | 40.8                        | 9.0                          | 14.7                         | 6.4                          | 21.10                                      | 5.7                                 | 15.40                                  |
|            | 10          | 60.9                        | 12.1                         | 12.2                         | 1.3                          | 13.53                                      | 5.7                                 | 7.83                                   |
|            | 2           | 103.1                       | 33.5                         | 47.6                         | 32.9                         | 80.52                                      | 5.7                                 | 74.82                                  |
|            | 9           | 87.7                        | 24.7                         | 32.7                         | 5.6                          | 38.32                                      | 5.7                                 | 32.62                                  |
|            | 7           | 145.8                       | 36.4                         | 51.9                         | 27.3                         | 79.20                                      | 5.7                                 | 73.50                                  |
|            | 11          | 38.4                        | 8.8                          | 13.4                         | 12.8                         | 26.15                                      | 5.7                                 | 20.45                                  |
|            | 8           | 110.0                       | 30.4                         | 173.3                        | 57.6                         | 230.88                                     | 5.7                                 | 225.18                                 |
|            |             |                             |                              |                              |                              |                                            |                                     |                                        |
| 29-11-2013 | 5           | 72.2                        | 24.4                         | 74.5                         | 23.6                         | 98.08                                      | 10.2                                | 87.88                                  |
|            | 4           | 129.6                       | 39.0                         | 53.8                         | 14.2                         | 67.96                                      | 10.2                                | 57.76                                  |
|            | 3           | 548.2                       | 76.9                         | 237.9                        | 15.5                         | 253.38                                     | 10.2                                | 243.18                                 |

Table S3: Detailed results personal measurements R&D area.

| Date       | Personal ID | OC $\mu\text{g}/\text{m}^3$ | EC1 $\mu\text{g}/\text{m}^3$ | EC2 $\mu\text{g}/\text{m}^3$ | EC3 $\mu\text{g}/\text{m}^3$ | Inhalable CNT+BC* $\mu\text{g}/\text{m}^3$ | Background $\mu\text{g}/\text{m}^3$ | Inhalable CNT $\mu\text{g}/\text{m}^3$ |
|------------|-------------|-----------------------------|------------------------------|------------------------------|------------------------------|--------------------------------------------|-------------------------------------|----------------------------------------|
| 29-05-2013 | 12          | 94.6                        | 10.6                         | 37.0                         | 7.4                          | 44.44                                      | 1.4                                 | 43.04                                  |
|            | 13          | 17.0                        | 2.3                          | 1.3                          | 0.3                          | 1.57                                       | 1.4                                 | 0.17                                   |
|            | 14          | 53.1                        | 14.7                         | 4.7                          | 0.8                          | 5.57                                       | 1.4                                 | 4.17                                   |
|            | 15          | 326.2                       | 84.2                         | 26.4                         | 3.1                          | 29.49                                      | 1.4                                 | 28.09                                  |
|            | 16          | 33.0                        | 5.4                          | 3.6                          | 1.1                          | 4.64                                       | 1.4                                 | 3.24                                   |
|            | 17          | 29.9                        | 4.4                          | 1.6                          | 0.3                          | 1.84                                       | 1.4                                 | 0.44                                   |
|            |             |                             |                              |                              |                              |                                            |                                     |                                        |
| 30-05-2013 | 16          | 90.8                        | 32.3                         | 49.7                         | 10.0                         | 59.70                                      | 0.2                                 | 59.50                                  |
|            | 12          | 56.6                        | 10.8                         | 7.6                          | 2.7                          | 10.33                                      | 0.2                                 | 10.13                                  |
|            | 18          | 56.4                        | 13.4                         | 4.7                          | 0.8                          | 5.51                                       | 0.2                                 | 5.31                                   |
|            | 17          | 32.1                        | 3.6                          | 1.2                          | 0.3                          | 1.43                                       | 0.2                                 | 1.23                                   |
|            | 19          | 66.9                        | 12.5                         | 4.1                          | 0.6                          | 4.76                                       | 0.2                                 | 4.56                                   |

25 Table S4: Detailed results personal measurements offices.

| Date       | Personal ID | OC $\mu\text{g}/\text{m}^3$ | EC1 $\mu\text{g}/\text{m}^3$ | EC2 $\mu\text{g}/\text{m}^3$ | EC3 $\mu\text{g}/\text{m}^3$ | Inhalable CNT+BC* $\mu\text{g}/\text{m}^3$ | Background $\mu\text{g}/\text{m}^3$ | Inhalable CNT $\mu\text{g}/\text{m}^3$ |
|------------|-------------|-----------------------------|------------------------------|------------------------------|------------------------------|--------------------------------------------|-------------------------------------|----------------------------------------|
| 27-11-2013 | 20          | 38.7                        | 4.6                          | 3.2                          | 6.7                          | 9.94                                       | 1.2                                 | 8.74                                   |
|            | 21          | 36.0                        | 5.9                          | 4.5                          | 7.2                          | 11.71                                      | 1.2                                 | 10.51                                  |
|            | 22          | 52.1                        | 7.7                          | 7.6                          | 3.4                          | 10.94                                      | 1.2                                 | 9.74                                   |
|            |             |                             |                              |                              |                              |                                            |                                     |                                        |
| 28-11-2013 | 23          | 49.6                        | 9.0                          | 3.3                          | 2.3                          | 5.56                                       | 1.2                                 | 4.36                                   |
|            | 22          | 56.2                        | 7.3                          | 4.4                          | 1.5                          | 5.87                                       | 1.2                                 | 4.67                                   |
